# Supplementary material for: Palladium-catalyzed oxidative carbonylative coupling of arylboronic acids with terminal alkynes to alkynones
Source: Royal Society of Chemistry journal article supplement (doi:10.1039/c4ob01128g), 2014-01-01

Kishore Natte, Jianbin Chen, Helfried Neumann, Matthias Beller, and Xiao-Feng Wu\*

*Leibniz-Institut für Katalyse an der Universität Rostock, Albert-Einstein-Straße 29a, 18059 Rostock (Germany)*  
E-mail: xiao-feng.wu@catalysis.de

## General Methods

NMR spectra were recorded on Bruker Avance 300 and Bruker ARX 400 spectrometers. Multiplets were assigned as s (singlet), d (doublet), t (triplet), dd (doublet of doublet), m (multiplet) and br. s (broad singlet). All measurements were carried out at room temperature unless otherwise stated. Electron impact (EI) mass spectra were recorded on AMD 402 mass spectrometer (70 eV). High resolution mass spectra (HRMS) were recorded on Agilent 6210. The data are given as mass units per charge ( $m/z$ ). Gas chromatography analysis was performed on an Agilent HP-5890 instrument with a FID detector and HP-5 capillary column (polydimethylsiloxane with 5% phenyl groups, 30 m, 0.32 mm i.d., 0.25  $\mu\text{m}$  film thickness) using argon as carrier gas. The products were isolated from the reaction mixture by column chromatography on silica gel 60, 0.063-0.2 mm, 70-230 mesh (Merck).

## General Procedure:

The reaction was carried out in a Parr Instruments 4560 series 300 mL autoclave containing an alloy plate with wells for six 4 mL Wheaton vials. Pd(TFA)<sub>2</sub> (5.0 mol%), DPPP (10.0 mol%), Ag<sub>2</sub>O (2 equiv.), phenylboronic acid (0.5 mmol), NaOAc (2 equiv.) and a magnetic stir bar were placed in each vials under air, which were then capped with a septum equipped with an inlet needle. Then 1-hexyne (1.2 equiv.) and acetone (1 mL) were added to the vial *via* syringe. The vials were placed in an autoclave, filled with 8 bar of CO at room temperature and keep the reaction at room temperature for 12 h. After the reaction was completed, the autoclave was vented to discharge N<sub>2</sub>. The product was extracted with ethyl acetate (5×3 mL). The organic layers were washed with brine, dried over Na<sub>2</sub>SO<sub>4</sub>, and evaporated to yield the crude reaction mixture. The purification occurred by flash chromatography on silica gel (eluent: heptane/EtOAc 95:05).

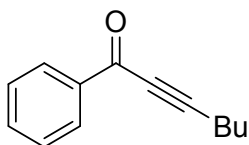

### 1-Phenylhept-2-yn-1-one

**<sup>1</sup>H NMR (300 MHz, Chloroform-*d*)**  $\delta$  8.27 – 8.01 (m, 2H), 7.64 – 7.54 (m, 2H), 7.49 (m, 1H), 2.51 (t, 2H), 1.75 – 1.61 (m, 2H), 1.59 – 1.43 (m, 2H), 0.98 (t,  $J = 7.3$  Hz, 3H).

**<sup>13</sup>C NMR (75 MHz, Chloroform-*d*)**  $\delta$  178.39, 137.06, 133.99, 129.67, 128.61, 96.99, 79.80, 29.98, 22.22, 19.06, 13.67.

**MS (EI, 70 eV):**  $m/z$  (%) = 186 ( $[M]^+$ , 20), 171 (10), 157 (40), 144 (100), 129 (30), 115 (60), 105 (62), 77 (50), 66 (10), 51 (12).

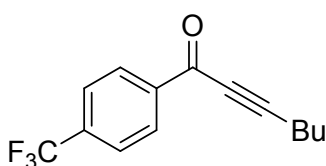

### 1-(4-(Trifluoromethyl)phenyl)hept-2-yn-1-one

**<sup>1</sup>H NMR (300 MHz, Chloroform-*d*)**  $\delta$  8.29 – 8.07 (m, 3H), 7.74 – 7.59 (m, 2H), 2.46 (t,  $J = 7.1$  Hz, 2H), 1.74 – 1.52 (m, 2H), 1.51 – 1.36 (m, 2H), 0.90 (t,  $J = 7.3$  Hz, 3H).

**<sup>13</sup>C NMR (75 MHz, Chloroform-*d*)**  $\delta$  176.94, 139.45, 135.01 (q,  $J = 32.51$  Hz), 129.81, 125.60 (q,  $J = 3.86$  Hz), 123.60 (q,  $J = 273.12$  Hz), 98.45, 79.48, 29.78, 22.12, 18.98, 13.53.

**MS (EI, 70 eV):**  $m/z$  (%) = 254 ( $[M]^+$ , 5), 235 (10), 225 (20), 212 (100), 173 (90), 185 (20), 173 (90), 145 (50), 109 (15), 79 (10).

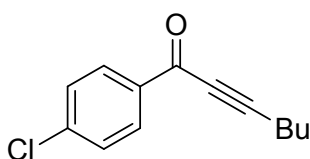

### 1-(4-Chlorophenyl)hept-2-yn-1-one

**<sup>1</sup>H NMR (400 MHz, Chloroform-*d*)**  $\delta$  8.04 – 7.92 (m, 2H), 7.42 – 7.33 (m, 2H), 2.43 (t,  $J = 7.1$  Hz, 2H), 1.66 – 1.51 (m, 2H), 1.48 – 1.34 (m, 2H), 0.89 (t,  $J = 7.3$  Hz, 3H).

**<sup>13</sup>C NMR (101 MHz, Chloroform-*d*)**  $\delta$  176.90, 140.46, 135.37, 130.87, 128.87, 97.46, 79.42, 29.83, 22.12, 18.96, 13.54.

**MS (EI, 70 eV):** = 220 ( $[M]^+$ , 10), 191 (15), 178 (100), 157 (10), 139 (90), 128 (7), 111 (40), 79 (20).

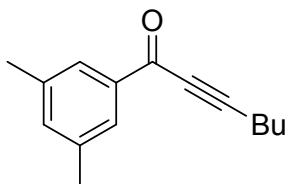

**1-(3,5-Dimethylphenyl)hept-2-yn-1-one**

**<sup>1</sup>H NMR (400 MHz, Chloroform-*d*)**  $\delta$  7.67 (s, 2H), 7.54 – 7.47 (m, 1H), 2.43 (t,  $J = 7.1$  Hz, 2H), 2.30 (s, 6H), 1.66 – 1.51 (m, 2H), 1.52 – 1.39 (m, 2H), 0.90 (t,  $J = 7.3$  Hz, 3H).

**<sup>13</sup>C NMR (101 MHz, Chloroform-*d*)**  $\delta$  178.2, 138.19, 135.64, 132.18, 127.37, 97.46, 79.93, 29.89, 23.02, 22.11, 21.44, 21.29.

**MS (EI, 70 eV):** = 214 ( $[M]^+$ , 96), 199 (70), 172 (100), 157 (30), 143 (85), 133 (80), 115 (20), 105 (15), 91 (10), 79 (40), 66 (5), 53 (8).

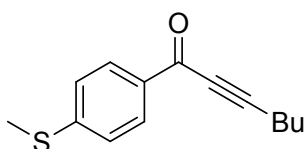

**1-(4-(Methylthio)phenyl)hept-2-yn-1-one**

**<sup>1</sup>H NMR (300 MHz, Chloroform-*d*)**  $\delta$  8.00 – 7.86 (m, 2H), 7.24 – 7.12 (m, 2H), 2.5 (s, 3H), 2.47 – 2.37 (m, 2H), 1.63 – 1.50 (m, 2H), 1.48 – 1.33 (m, 2H), 0.89 (t,  $J = 7.2$  Hz, 3H).

**<sup>13</sup>C NMR (101 MHz, Chloroform-*d*)**  $\delta$  177.25, 147.18, 133.50, 129.87, 124.72, 96.44, 79.60, 29.87, 22.09, 18.92, 14.73, 14.70, 13.54.

**MS (EI, 70 eV):** = 232 ( $[M]^+$ , 100), 203 (5), 190 (10), 175 (8), 161 (10), 151 (12).

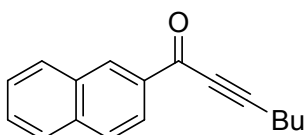

**1-(Naphthalen-2-yl)hept-2-yn-1-one**

**<sup>1</sup>H NMR (300 MHz, Chloroform-*d*)**  $\delta$  8.67 – 8.58 (s, 1H), 8.07 (dd,  $J = 8.7, 1.7$  Hz, 2H), 7.96 – 7.90 (m, 2H), 7.81 (dd,  $J = 8.1, 1.7$  Hz, 2H), 2.49 (t,  $J = 7.0$  Hz, 2H), 1.73 – 1.57 (m, 2H), 1.53 – 1.40 (m, 2H), 0.93 (t,  $J = 7.3$  Hz, 3H).

**<sup>13</sup>C NMR (101 MHz, Chloroform-*d*)**  $\delta$  178.19, 136.06, 134.49, 132.62, 132.41, 129.81, 128.86, 128.38, 127.89, 126.85, 124.02, 96.79, 79.84, 29.90, 22.14, 19.01, 13.57.

**MS (EI, 70 eV):** = 236 ( $[M]^+$ , 100), 207 (20), 194 (18), 179 (10), 165 (50), 155 (15).

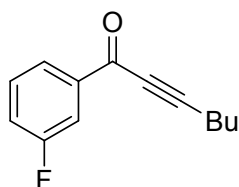

### 1-(3-Fluorophenyl)hept-2-yn-1-one

**<sup>1</sup>H NMR (300 MHz, Chloroform-*d*)**  $\delta$  7.86 (dt,  $J = 7.7, 1.3$  Hz, 2H), 7.72 (ddd,  $J = 9.3, 2.7, 1.5$  Hz, 2H), 7.39 (td,  $J = 8.0, 5.4$  Hz, 1H), 2.44 (t,  $J = 7.1$  Hz, 2H), 1.72 – 1.54 (m, 2H), 1.47 – 1.35 (m, 2H), 0.90 (t,  $J = 7.3$  Hz, 3H).

**<sup>13</sup>C NMR (101 MHz, Chloroform-*d*)**  $\delta$  176.81 (d,  $J = 2.9$  Hz), 162.68 (d,  $J = 248.1$  Hz), 139.01 (d,  $J = 6.7$  Hz), 134.16 (d,  $J = 7.5$  Hz), 125.34 (d,  $J = 2.97$  Hz), 120.87 (d,  $J = 21.8$  Hz), 115.99 (d,  $J = 23.1$  Hz), 97.56, 79.40, 29.79, 22.09, 18.93, 13.51.

**MS (EI, 70 eV):** = 203 ( $[M]^-$ , 10), 175 (25), 162 (100), 146 (10), 133 (50), 12 (90), 109 (40), 95 (45), 79 (20), 66 (10), 53 (7).

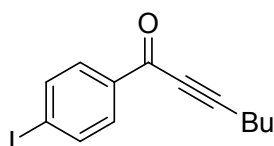

### 1-(4-Iodophenyl)hept-2-yn-1-one

**<sup>1</sup>H NMR (300 MHz, CDCl<sub>3</sub>)**  $\delta$  7.84 (m, 4H), 2.50 (t,  $J = 7.0$  Hz, 2H), 1.88 – 1.54 (m, 2H), 1.60 – 1.36 (m, 2H), 0.96 (t,  $J = 7.3$  Hz, 3H).

**<sup>13</sup>C NMR (75 MHz, CDCl<sub>3</sub>)**  $\delta$  177.4, 137.8, 136.3, 130.8, 102.3, 97.5, 79.3, 29.8, 22.1, 18.9, 13.5.

**MS (EI, 70 eV):** = 312 ( $[M]^+$ , 100), 283 (40), 270 (100), 241 (10), 231 (90), 203 (15), 157 (5).

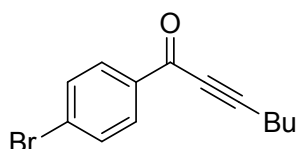

### 1-(4-Bromophenyl)hept-2-yn-1-one

**<sup>1</sup>H NMR (300 MHz, CDCl<sub>3</sub>)**  $\delta$  8.10 – 7.90 (m, 2H), 7.82 – 7.47 (m, 2H), 2.50 (t,  $J = 7.0$  Hz, 2H), 1.66 (m, 2H), 1.55 – 1.37 (m, 2H), 0.96 (t,  $J = 7.3$  Hz, 3H).

**<sup>13</sup>C NMR (75 MHz, CDCl<sub>3</sub>)**  $\delta$  177.1, 135.1, 131.1, 130.0, 129.3, 97.5, 79.4, 29.8, 22.1, 18.1, 13.5.

**MS (EI, 70 eV):** = 265 ( $[M]^-$ , 10), 237 (10), 222 (100), 193 (10), 185 (96), 167 (8), 157 (60).

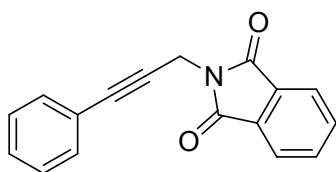

### 2-(3-Phenylprop-2-yn-1-yl)-1H-indene-1,3(2H)-dione

**<sup>1</sup>H NMR (300 MHz, Chloroform-*d*)** δ 7.82 (dd, *J* = 5.5, 3.1 Hz, 2H), 7.66 (dd, *J* = 5.5, 3.1 Hz, 2H), 7.41 – 7.29 (m, 2H), 7.25 – 7.11 (m, 3H), 4.61 (s, 2H).

**<sup>13</sup>C NMR (75 MHz, CDCl<sub>3</sub>)** δ 167.1, 134.3, 132.1, 131.9, 128.5, 128.2, 123.1, 122.3, 82.9, 82.6, 27.4.

**MS (EI, 70 eV):** =261 ([M]<sup>+</sup>, 100), 232 (70), 204 (50), 178 (15), 165 (10), 165 (5).

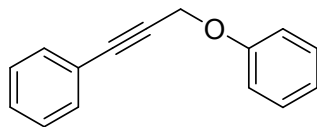

### (3-Phenoxyprop-1-yn-1-yl)benzene

**<sup>1</sup>H NMR (300 MHz, Chloroform-*d*)** δ 7.45 – 7.31 (m, 2H), 7.30 – 7.15 (m, 5H), 7.01 – 6.86 (m, 3H), 4.84 (d, *J* = 0.8 Hz, 2H).

**<sup>13</sup>C NMR (75 MHz, CDCl<sub>3</sub>)** δ 157.8, 131.8, 129.5, 128.6, 128.3, 122.3, 121.0, 115.0, 87.0, 83.3, 56.1.

**MS (EI, 70 eV):** =208 ([M]<sup>+</sup>, 5), 115 (100), 105 (5), 89 (3), 65 (5).

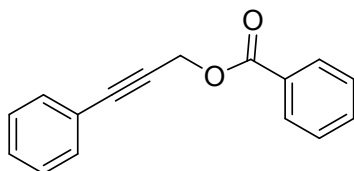

### 3-Phenylprop-2-yn-1-yl benzoate

**<sup>1</sup>H NMR (300 MHz, Chloroform-*d*)** δ 8.23 – 8.00 (m, 2H), 7.66 – 7.54 (m, 1H), 7.52 – 7.40 (m, 4H), 7.38 – 7.28 (m, 3H), 5.16 (s, 2H).

**<sup>13</sup>C NMR (75 MHz, CDCl<sub>3</sub>)** δ 165.9, 133.2, 131.9, 129.8, 129.6, 128.7, 128.4, 128.3, 122.2, 86.6, 83.0, 53.3.

**MS (EI, 70 eV):** =236 ([M]<sup>+</sup>, 100), 208 (25), 191 (5).

Failed substrates:

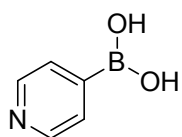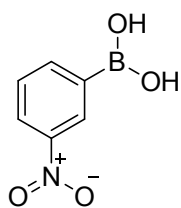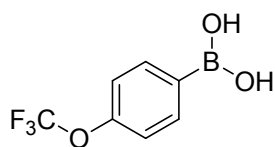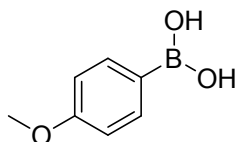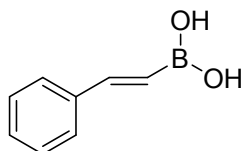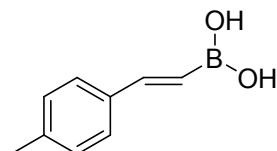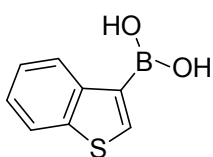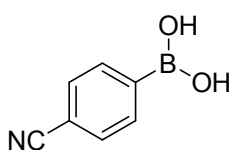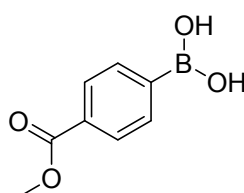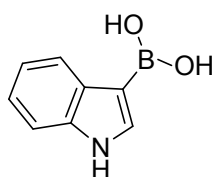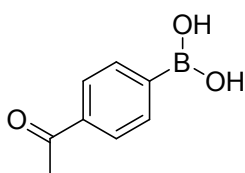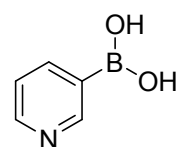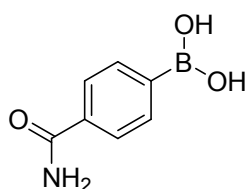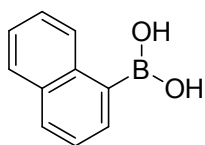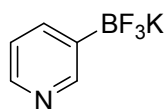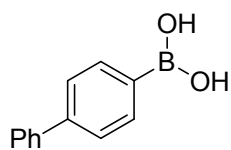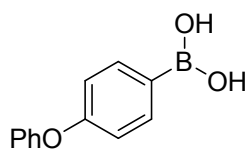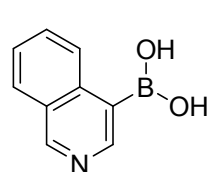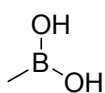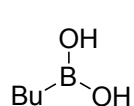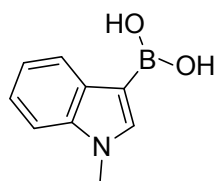

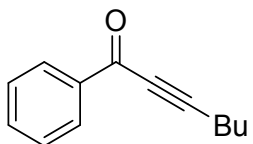

140514.305.11.fid  
Kishore/ NK 1074  
Au1H CDCl3 /opt/topspin 1405 5

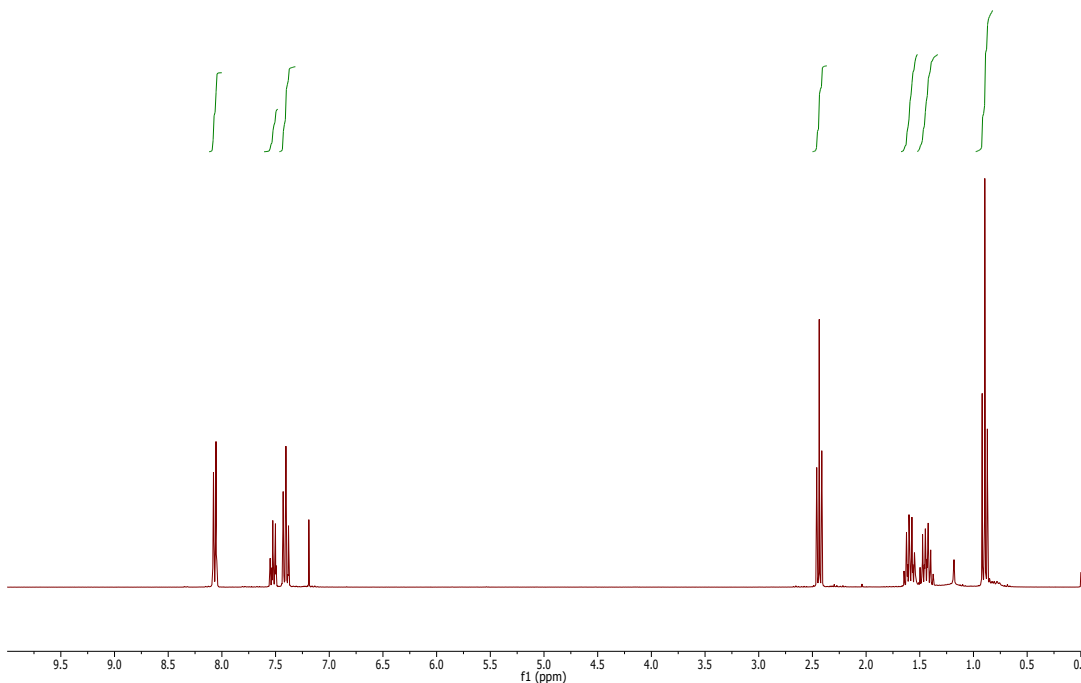

140514.305.10.fid  
Kishore/ NK 1074  
Au13C CDCl3 /opt/topspin 1405 5

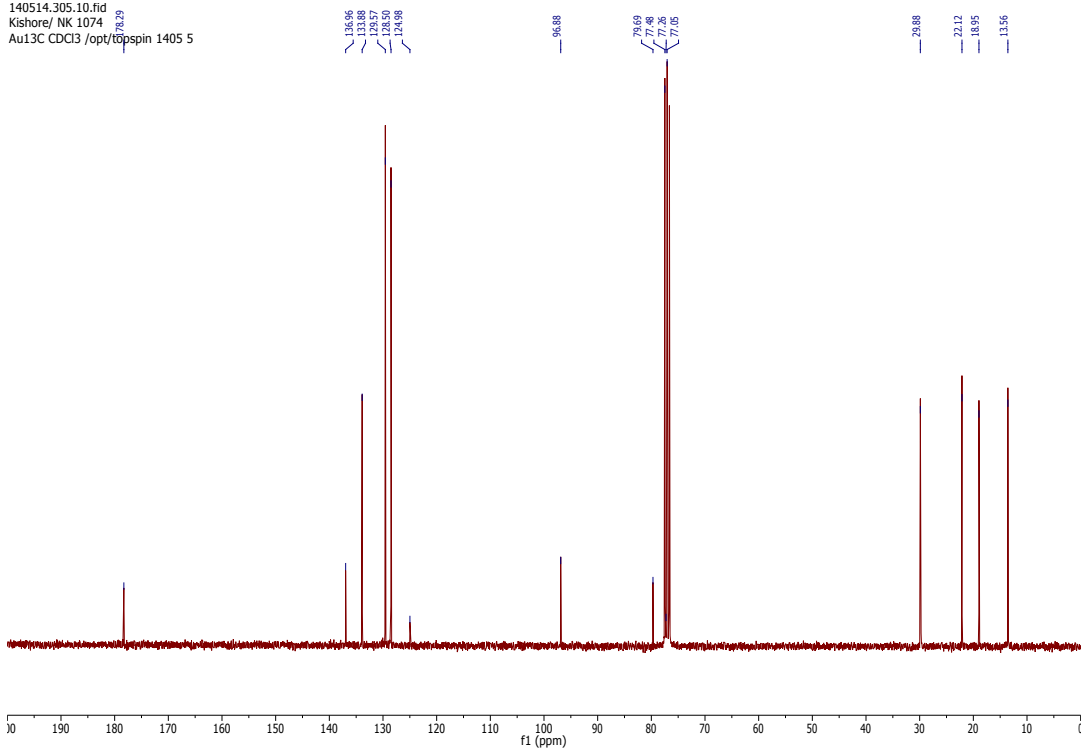

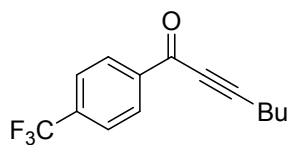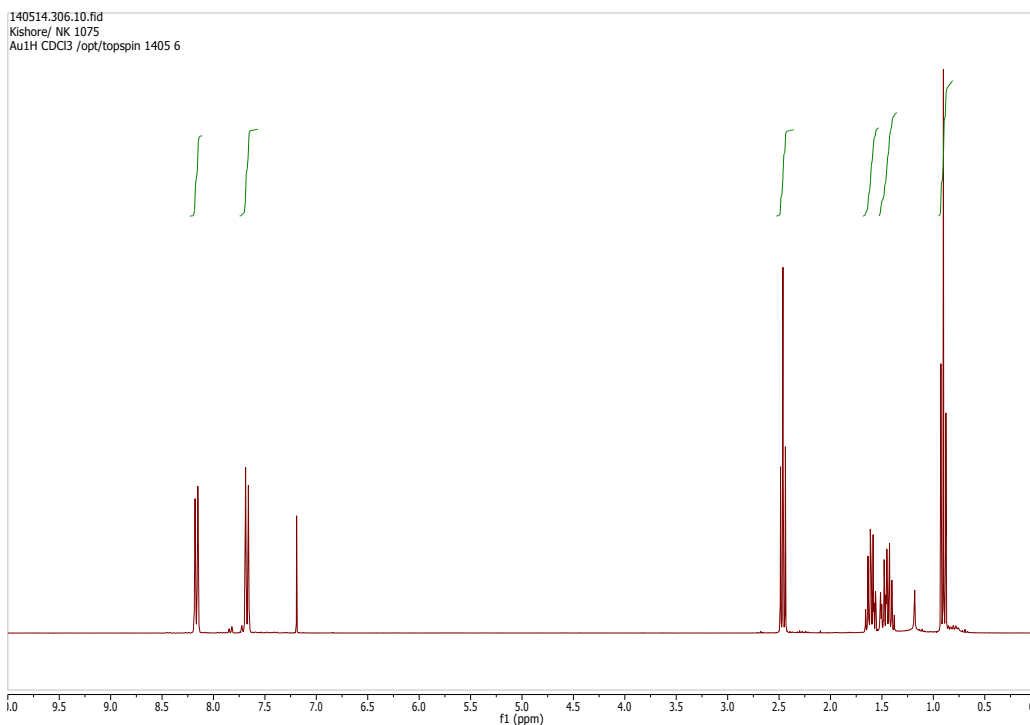

Kishore/ NK 1075  
Au13C CDCl3 /opt/topspin 1405 6

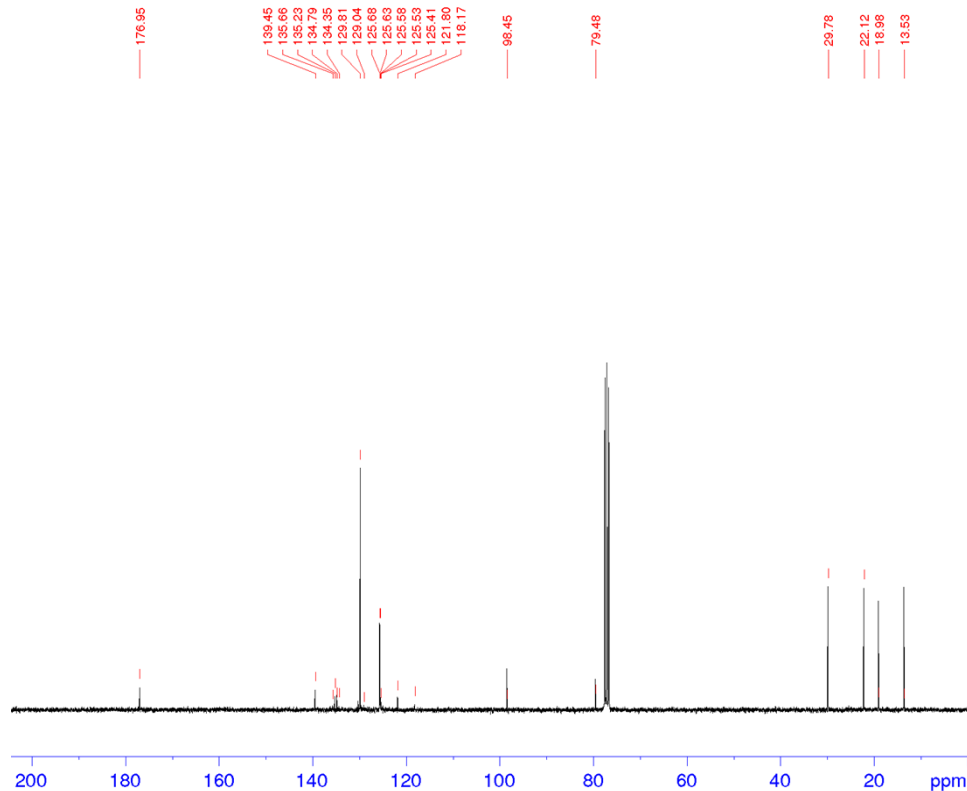

Current Data Parameters  
NAME 140514.306  
EXPNO 11  
PROCNO 1

F2 - Acquisition Parameters  
Date\_ 20140514  
Time 15.11  
INSTRUM AV300  
PROBHD 5 mm PABBO BB-  
PULPROG zgpg30  
TD 32768  
SOLVENT CDCl3  
NS 2000  
DS 4  
SWH 21097.047 Hz  
FIDRES 0.643831 Hz  
AQ 0.776016 sec  
RG 327.68  
DW 23.700 usec  
DE 6.00 usec  
TE 296.6 K  
D1 2.0000000 sec  
D11 0.0300000 sec  
TD0 1

===== CHANNEL f1 =====  
NUC1 13C  
P1 9.60 usec  
PL1 -1.10 dB  
PL1W 37.53686523 W  
SFO1 75.4771825 MHz

===== CHANNEL f2 =====  
CPDPRG2 waltz16  
NUC2 1H  
PCPD2 100.00 usec  
PL2 0 dB  
PL12 19.00 dB  
PL13 21.00 dB  
PL2W 12.28312492 W  
PL12W 0.15463538 W  
PL13W 0.09756833 W  
SFO2 300.1312005 MHz

F2 - Processing parameters  
SI 32768  
SF 75.4677490 MHz  
WDW EM  
SFB 0  
LB 1.00 Hz  
GB 0  
PC 1.40



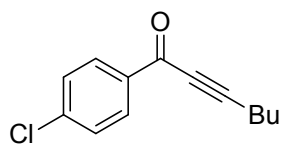

140515.423.10.fid  
Kishore/ NK 1082  
Au1H CDCl3 /opt/topspin 1405 23

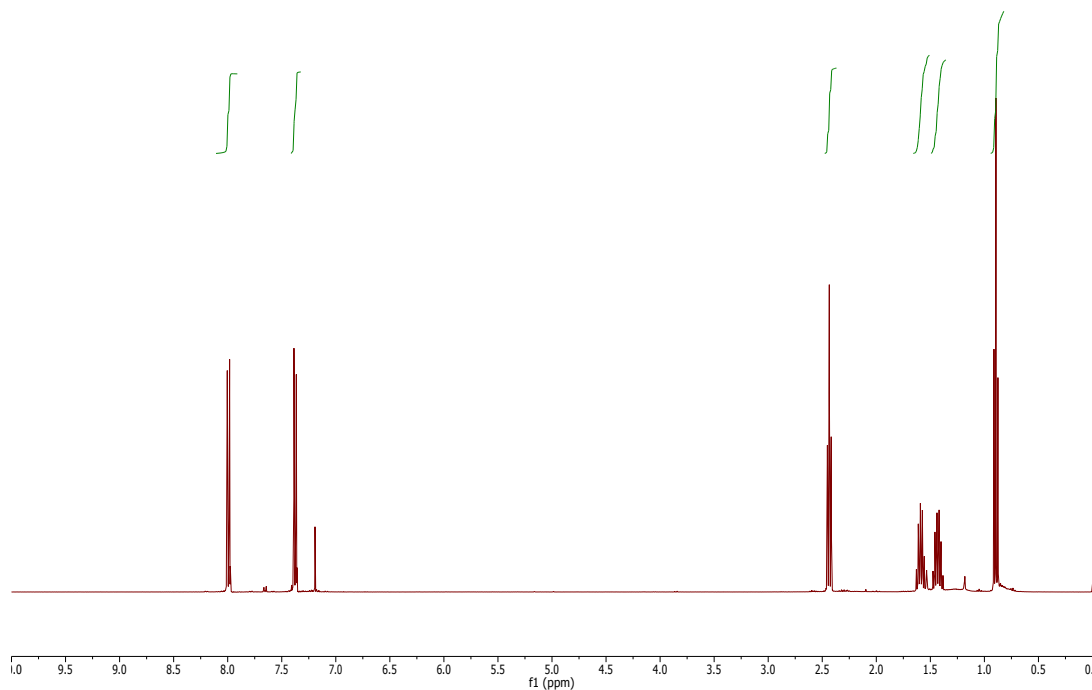

140515.423.11.fid  
Kishore/ NK 1082  
Au13C CDCl3 /opt/topspin 1405 23

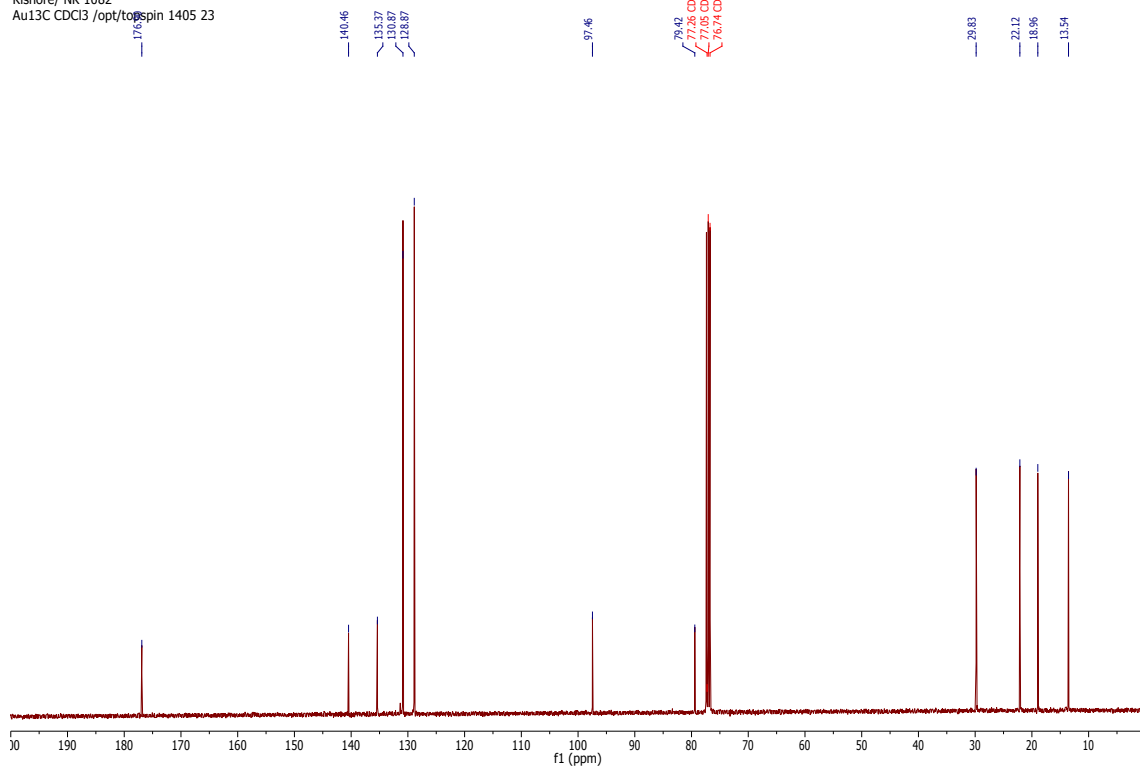

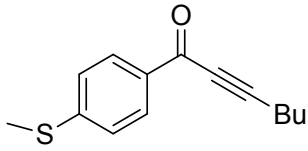

140516.1333.10.fid  
 NK1083  
 PROTON CDCl<sub>3</sub> {C:\Bruker\TopSpin3.2} 1405 3

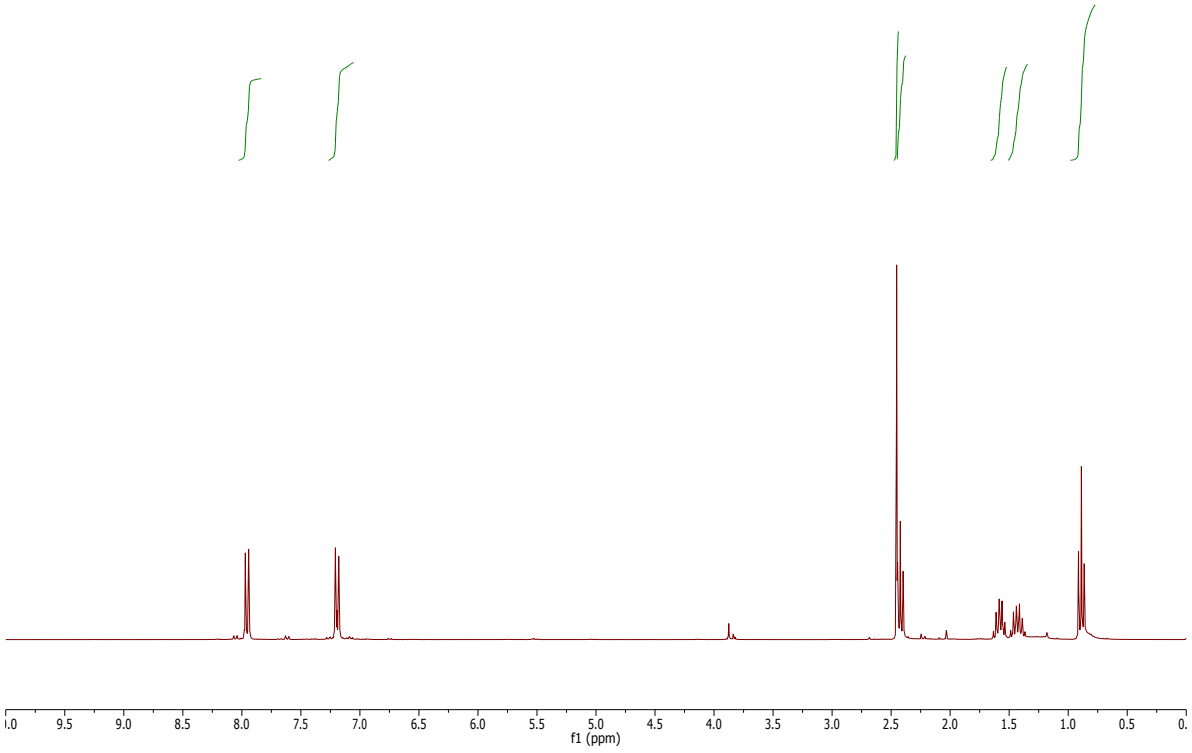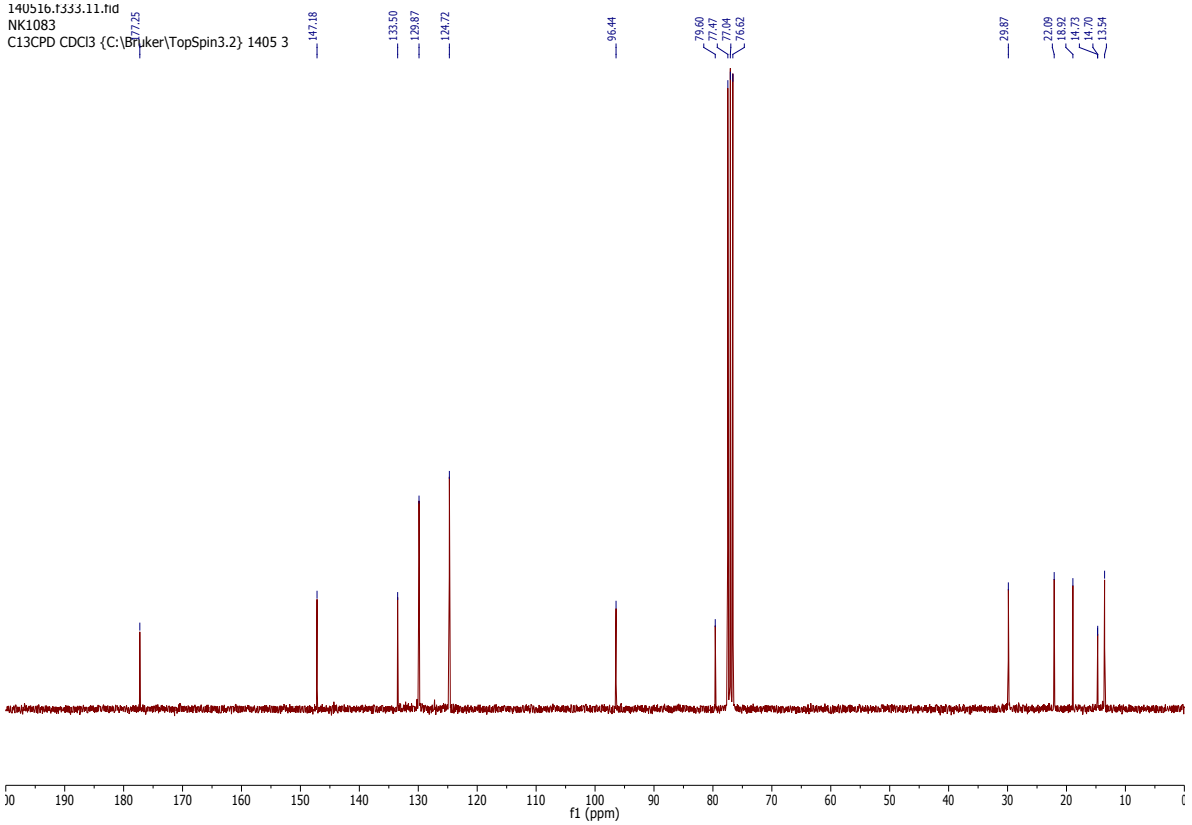

140516.f336.10.fid  
NK1086  
PROTON CDCl3 (C:\Bruker\TopSpin3.2) 1405 6

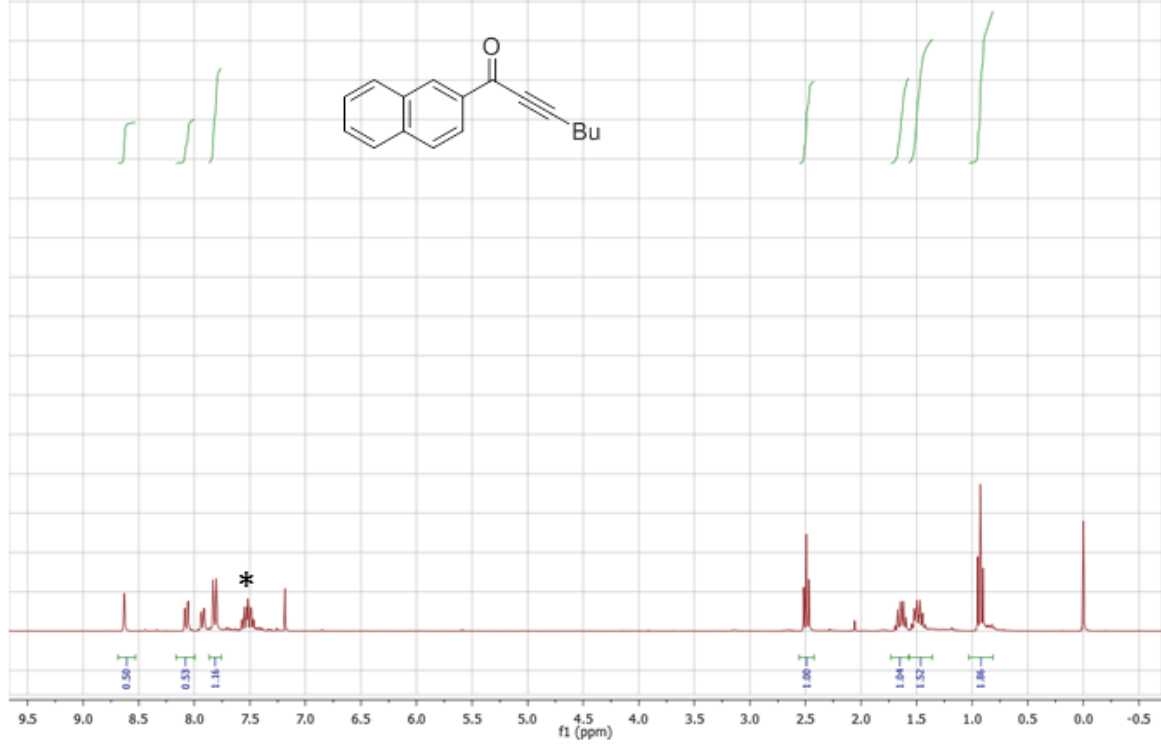

\* The peak belongs to side product

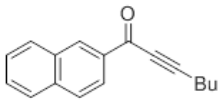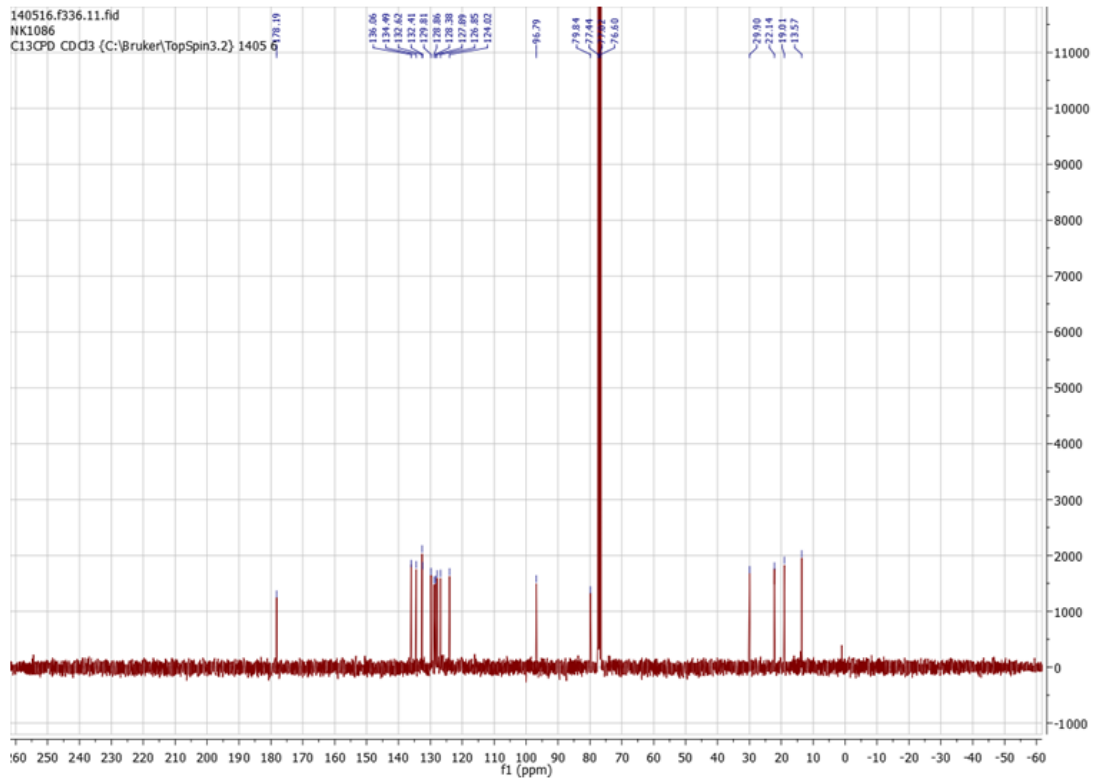

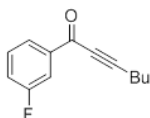

140516.f335.10.fid  
NK1087  
PROTON CDCl3 {C:\Bruker\TopSpin3.2} 1405 5

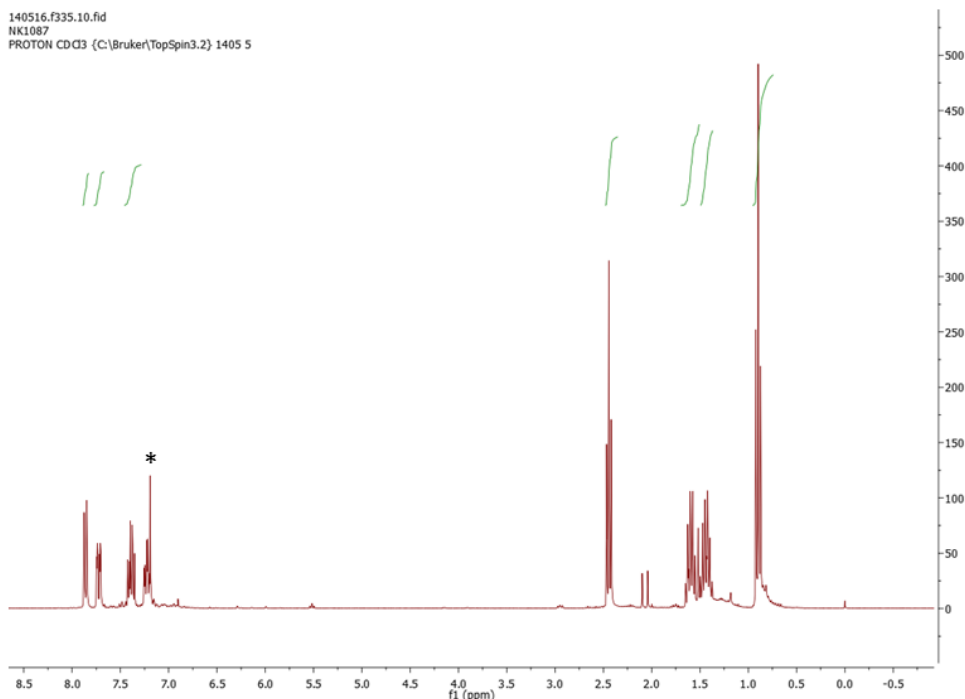

\* The peak belongs to biphenyl

NK1087  
C13CPD CDCl3 {C:\Bruker\TopSpin3.2} 1405 5

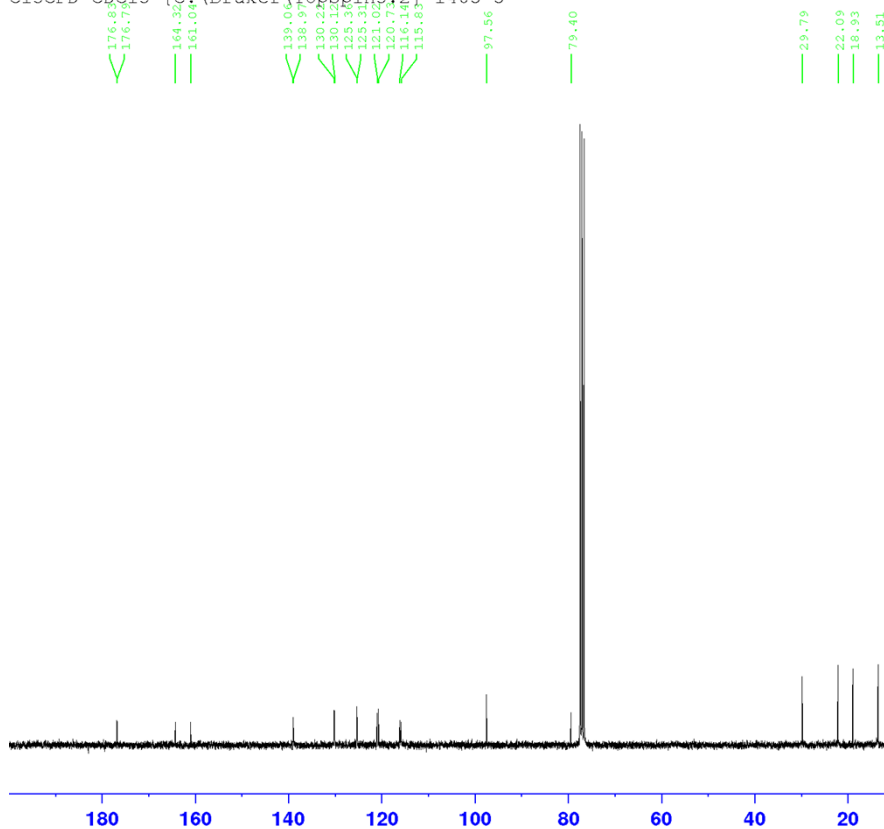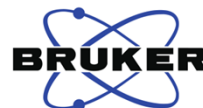

Current Data Parameters  
NAME 140516.f335  
EXPNO 11  
PROCNO 1

F2 - Acquisition Parameters  
Date\_ 20140516  
Time 20.44  
INSTRUM FOURIER300  
PROBHD 5 mm DUL 13C-1  
PULPROG zgpg30  
TD 6536  
SOLVENT CDCl3  
NS 2048  
DS 4  
SWH 24414.063 Hz  
FIDRES 0.372529 Hz  
AQ 1.3421773 sec  
RG 501.187  
DW 20.480 usec  
DE 6.50 usec  
TE 298.2 K  
D1 2.0000000 sec  
D11 0.0300000 sec  
D31 0.0000140 sec  
D40 0.02898005 sec  
L4 40  
L5 57  
F32 90.00 usec  
TD0 1

===== CHANNEL f1 =====  
SFO1 75.4928982 MHz  
NUC1 13C  
P1 11.40 usec  
PLW1 30.0000000 W

===== CHANNEL f2 =====  
SFO2 300.2012008 MHz  
NUC2 1H  
CPDPRG2 waltz16  
PCPD2 90.00 usec  
PLW2 16.0000000 W  
PLW12 0.23901001 W  
PLW13 0.19360000 W

F2 - Processing parameters  
SI 32768  
SF 75.4853500 MHz  
WDW EM  
SSB 0  
LB 1.00 Hz  
GB 0  
PC 1.40

140519.f328.10.fid  
NK1088  
PROTON CDCl3 {C:\Bruker\TopSpin3.2} 1405 12

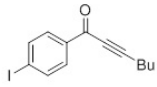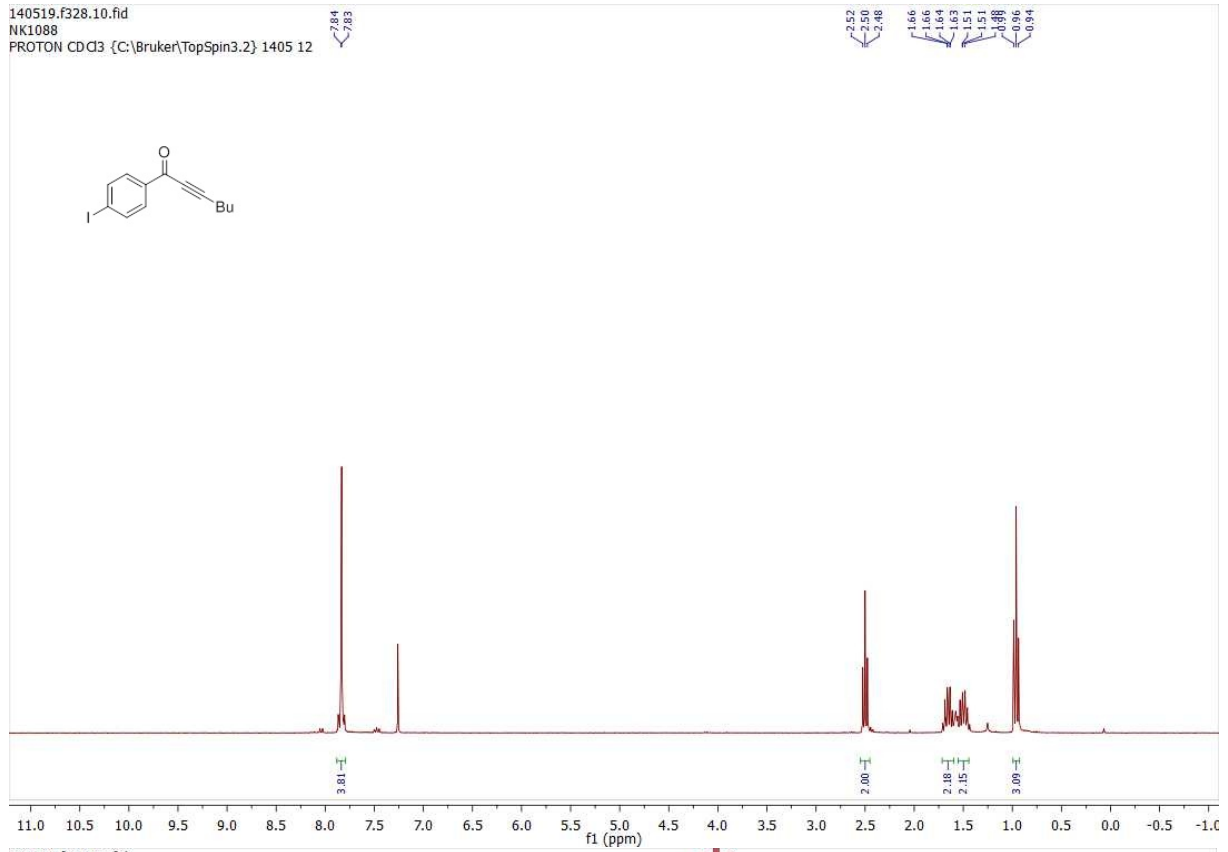

140519.f328.11.fid  
NK1088  
C13CPD CDCl3 {C:\Bruker\TopSpin3.2} 1405 12

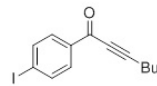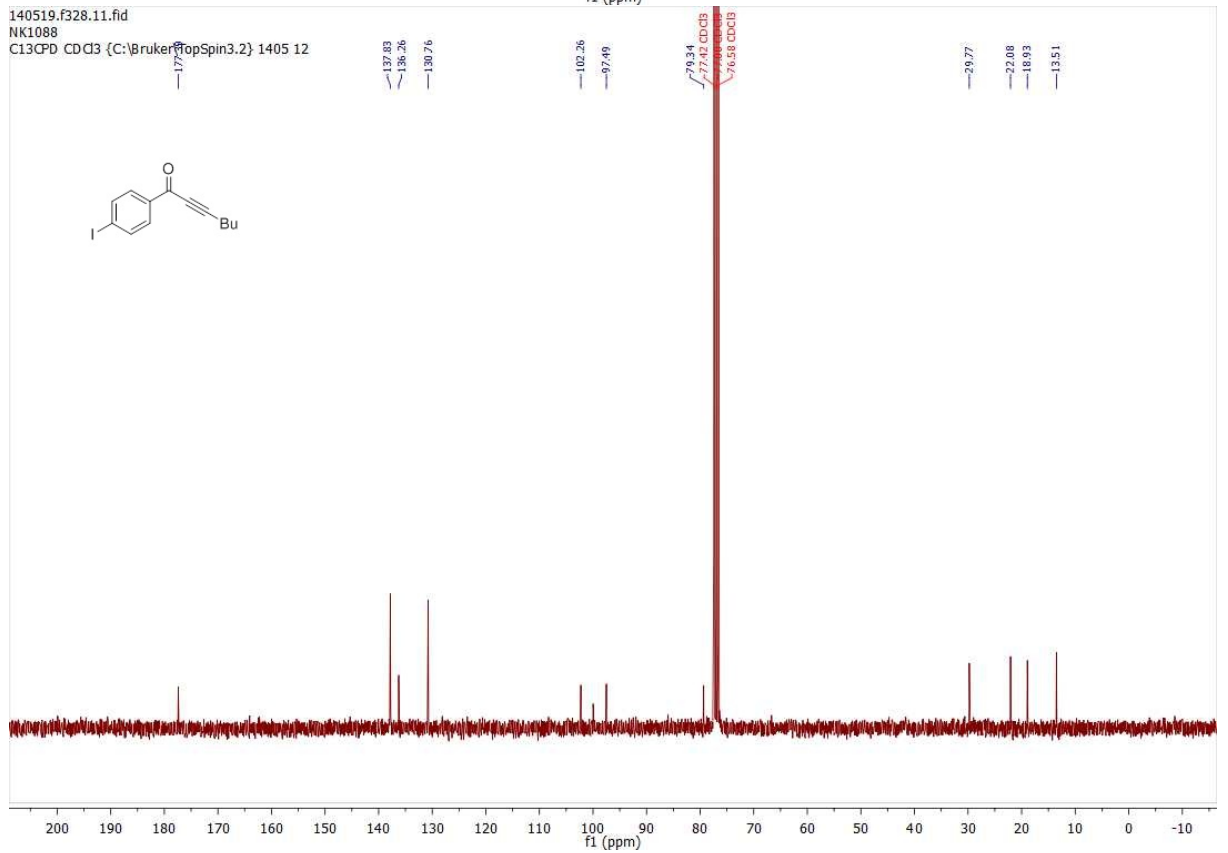

140519.f329.10.fid  
NK1090  
PROTON CDCl3 {C:\Bruker\TopSpin3.2} 1405 13

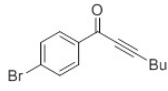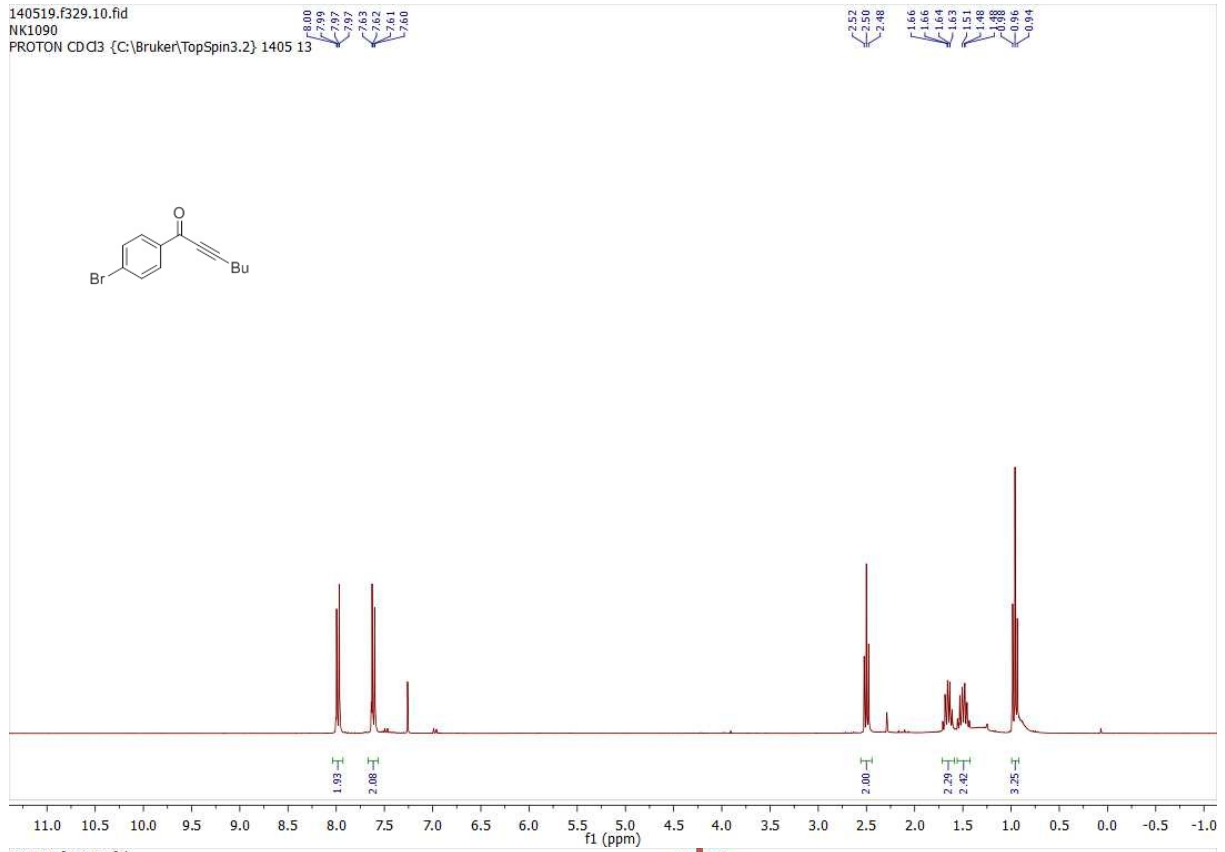

140519.f329.11.fid  
NK1090  
C13CPD CDCl3 {C:\Bruker\TopSpin3.2} 1405 13

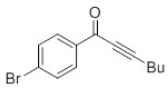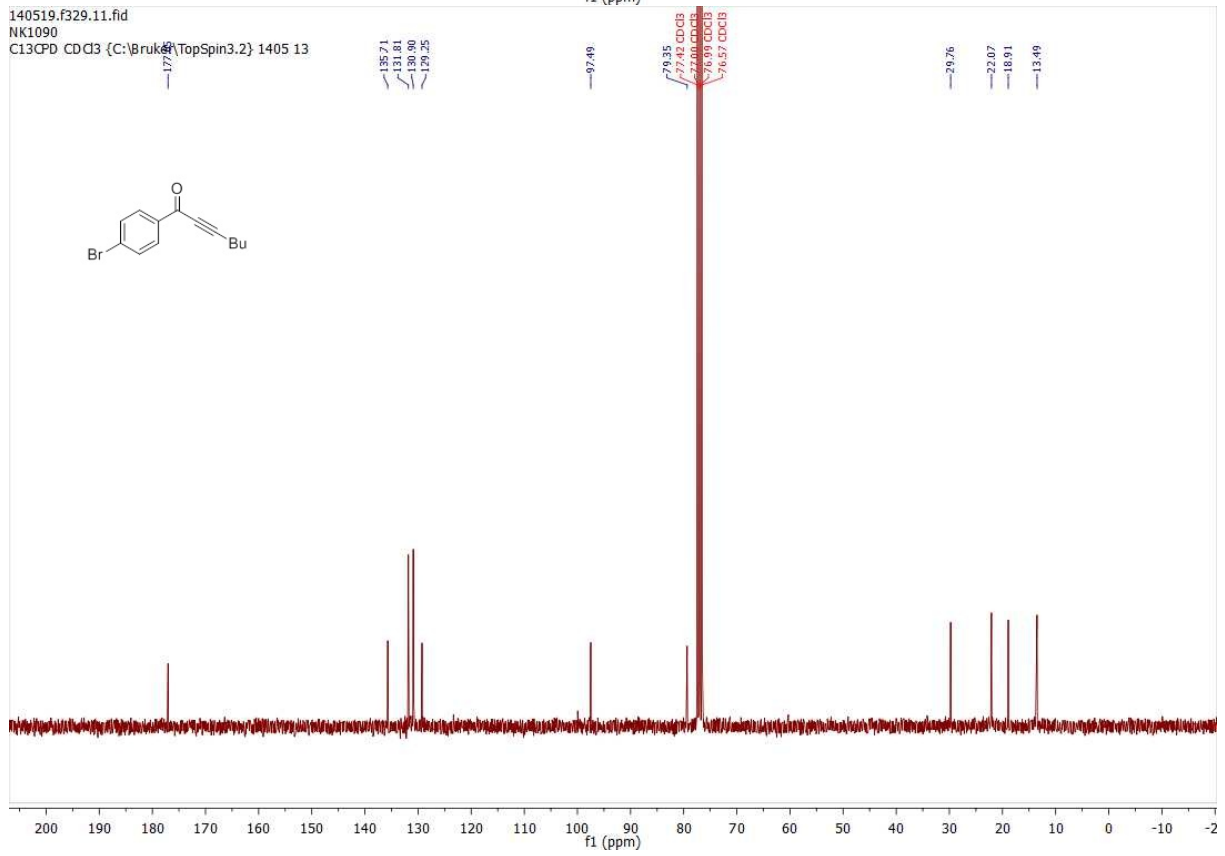

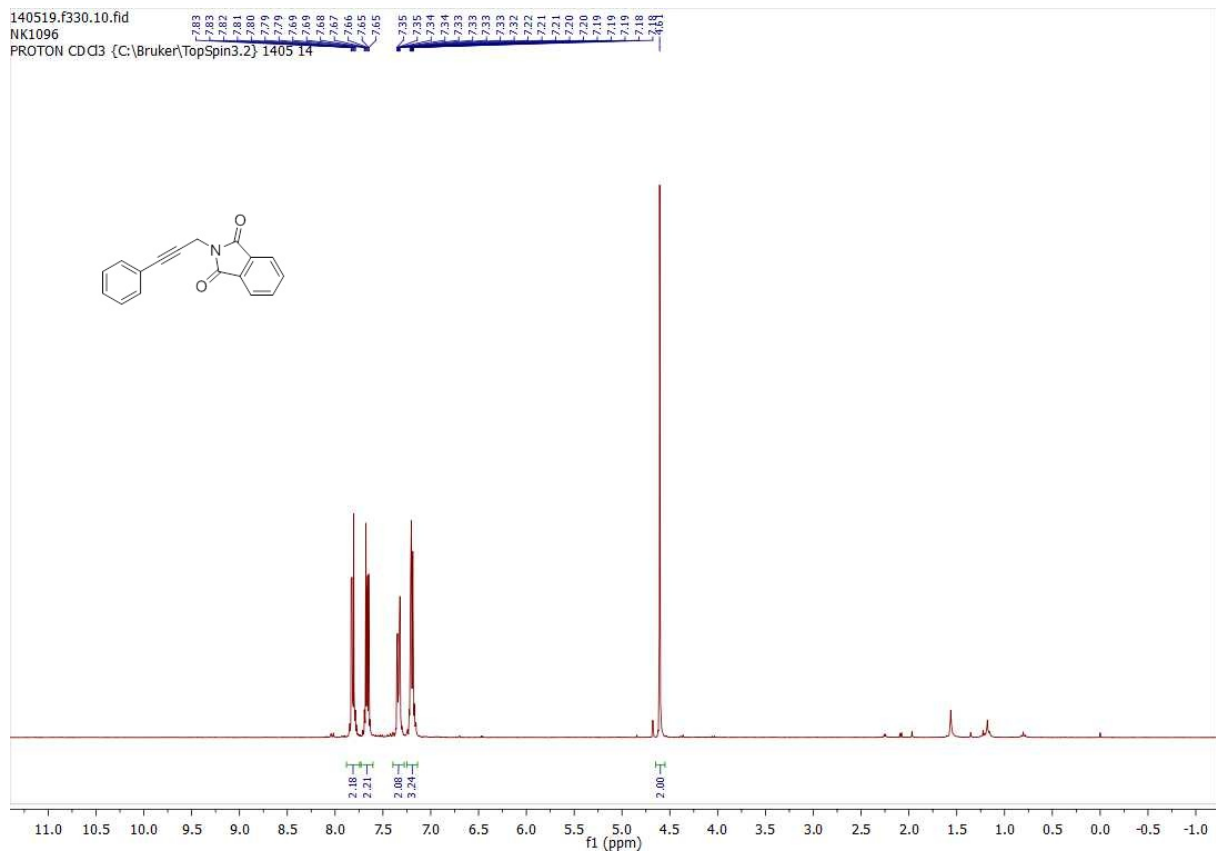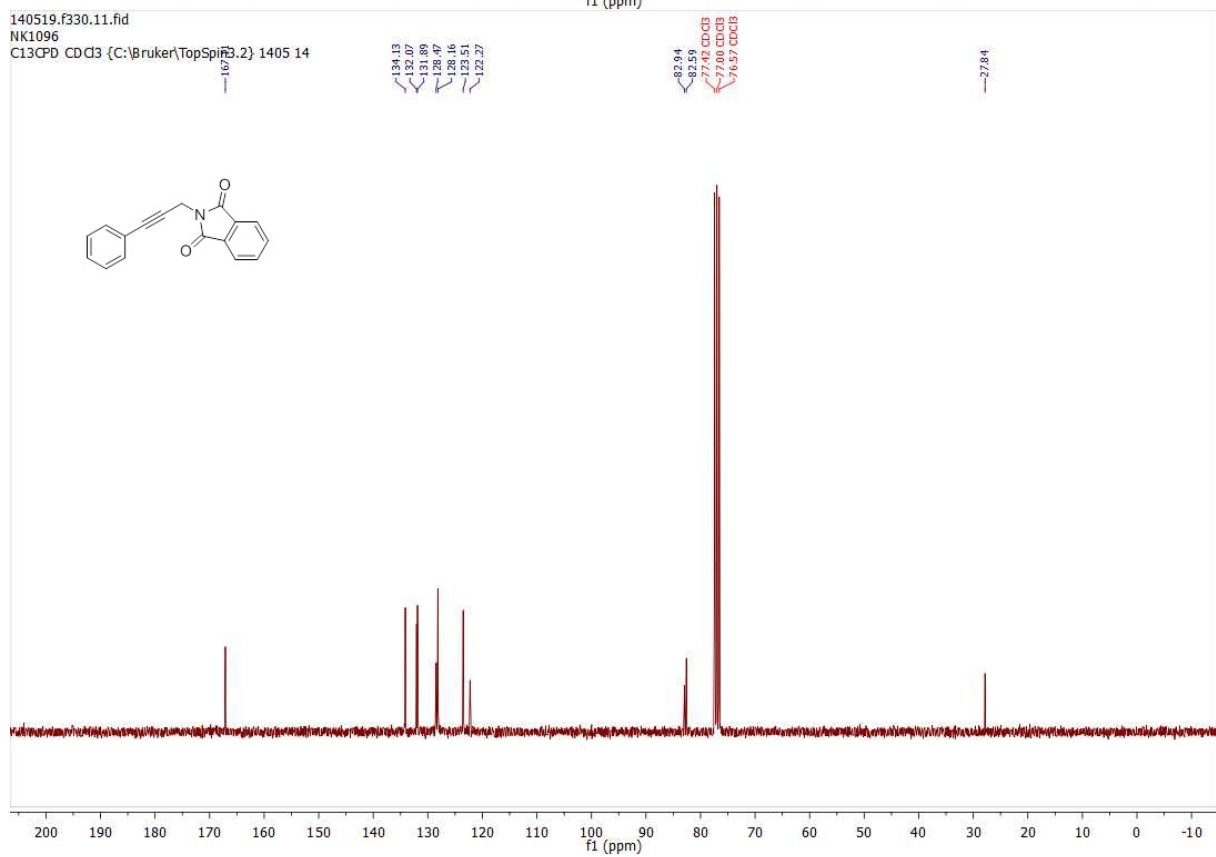

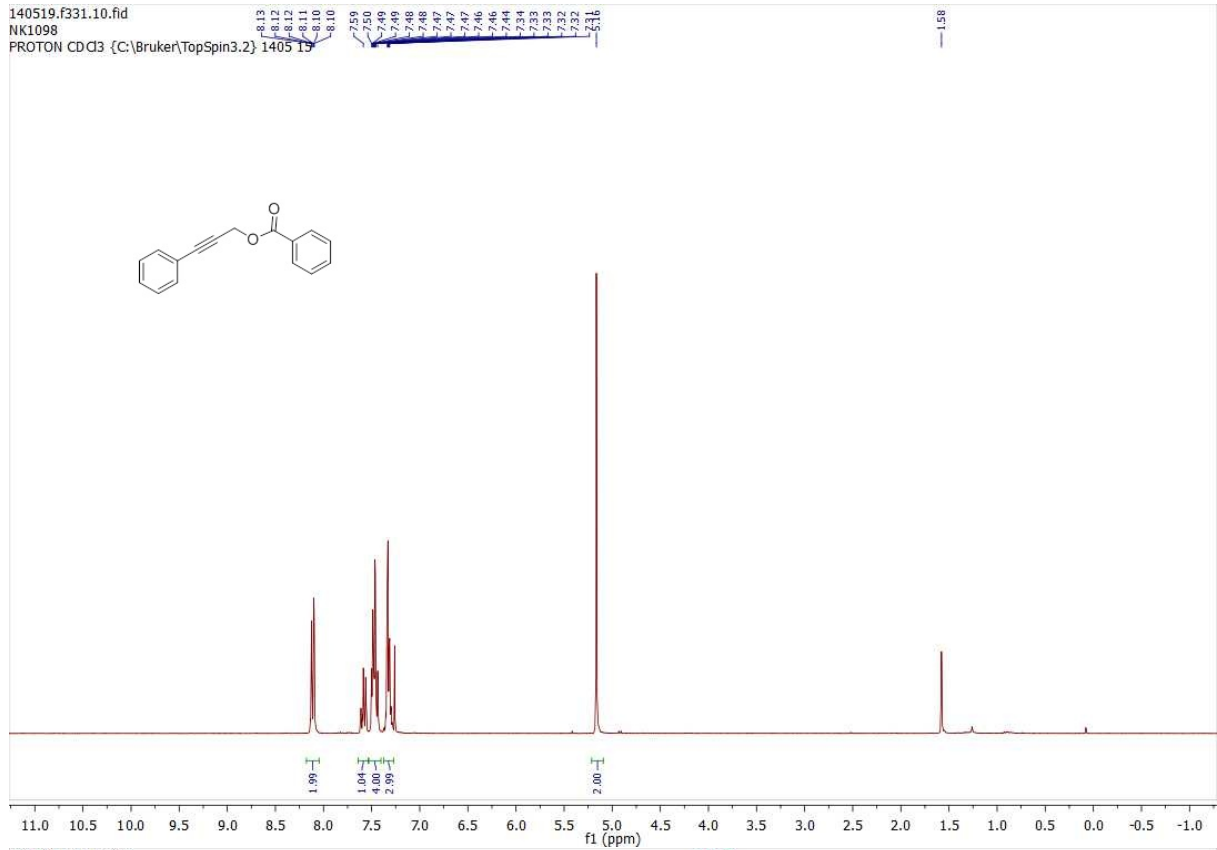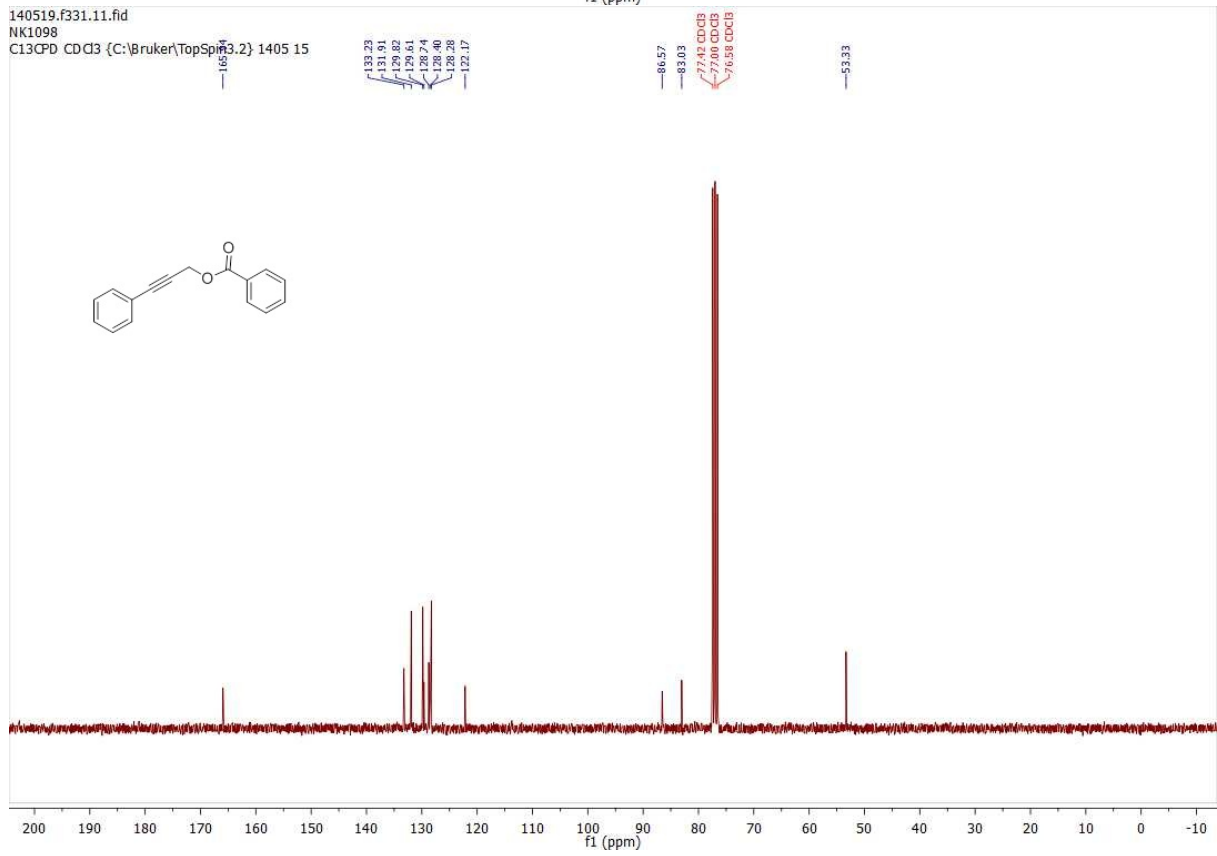



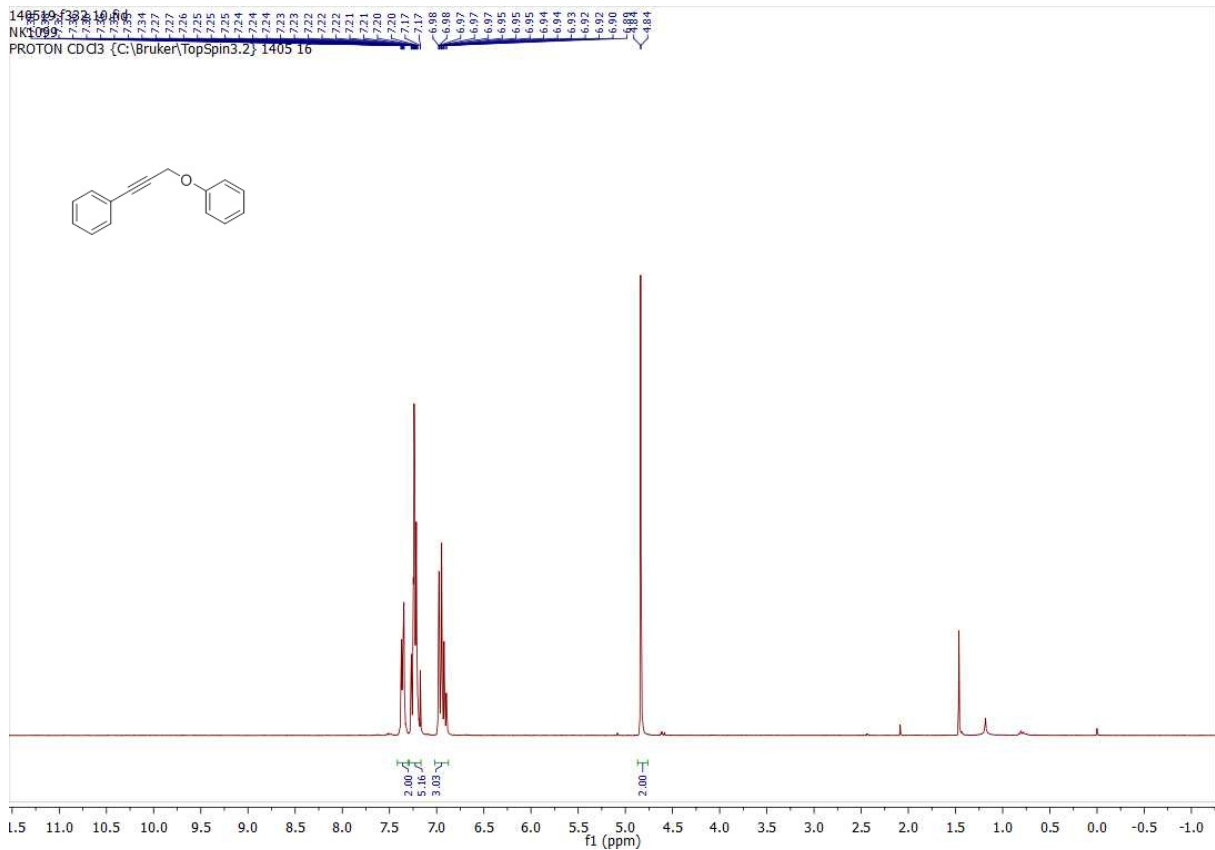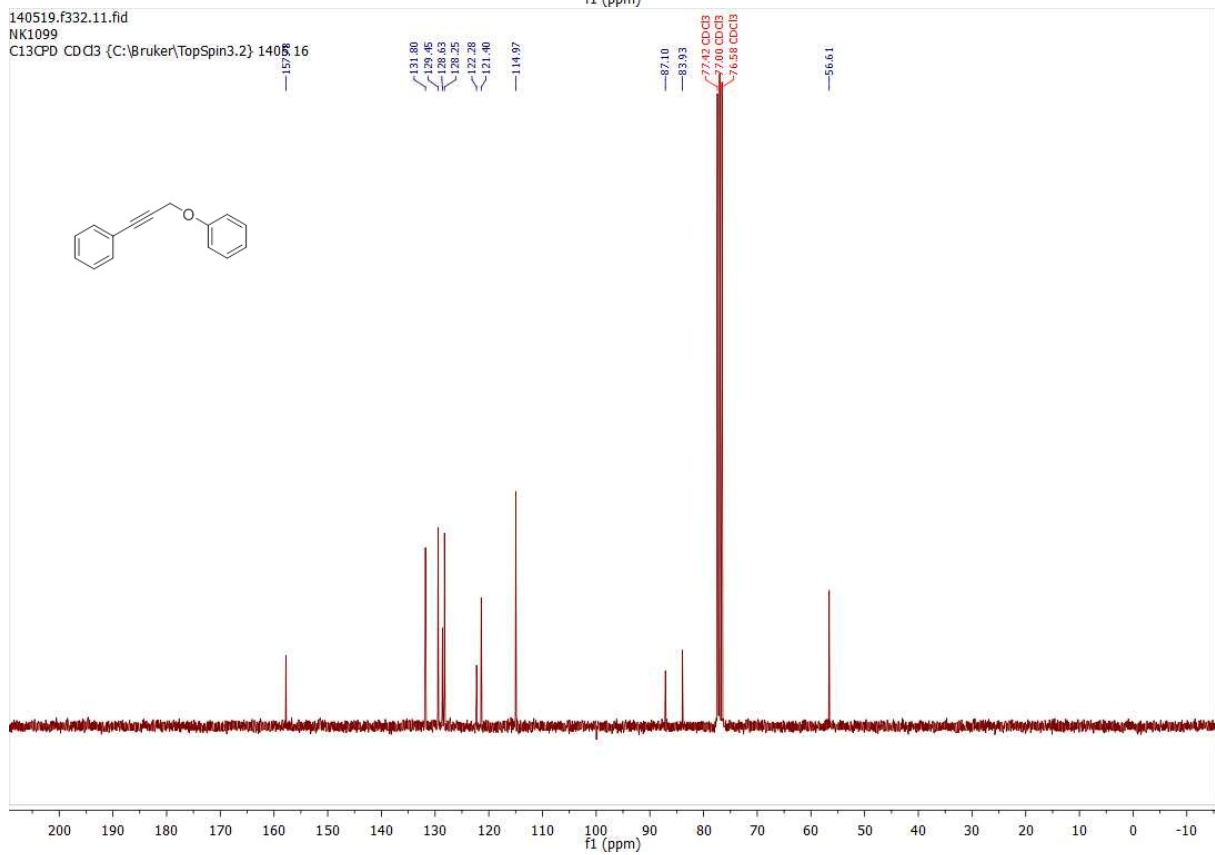

Supplement: c4ob01128g1.pdf [file c4ob01128g1.pdf]
